# Supplementary material
Source: publisher site journal article supplement (https://www.spandidos-publications.com/4754/downloadSupplementary)
Supplement: Supplementary file 1 [file downloadSupplementary]

## Sheet: heatmap_miRNA_mRNA
Table SI. Heatmap of the expression (∆∆Cq data) of all investigated genes and miRNAs in each patient.
A, Genes
	Invasive front versus centre						Lymph node metastases versus centre						Liver metastases versus centre						Lymph node versus invasive front						Liver metastases versus invasive front						Lymph node metastases versus liver metastases
Patient no.	L1TD1	SLITRK6		TCEA3		ST6GALNAC1	L1TD1	SLITRK6		TCEA3		ST6GALNAC1	L1TD1	SLITRK6		TCEA3		ST6GALNAC1	L1TD1	SLITRK6		TCEA3		ST6GALNAC1	L1TD1	SLITRK6		TCEA3		ST6GALNAC1	L1TD1	SLITRK6		TCEA3		ST6GALNAC1
Patient 1	NE	NE		-0.91252		NE	NA	NA		NA		NA	0.436271	-0.536963		-5.4483		-4.67541	NA	NA		NA		NA	NE	NE		NE		NE	NA	NA		NA		NA
Patient 2	NE	6.19222		-0.437777		-1.16525							-7.83694	-0.403085		-1.54604		-1.92109							NE	-6.59531		-1.24774		-0.755834
Patient 3	0.266693	0.788883		0.0488831		-1.02058	-6.76481	-5.06186		-2.06186		-3.39461	-6.41036	1.94956		0.562597		-0.515155	-7.0315	-5.85074		-2.11074		-2.37403	-6.67705	1.16067		2.3492		0.505421	0.354452	7.01141		2.62445		2.87945
Patient 4	NE	-1.89448		-0.964479		1.17426	NE	-6.41625		-2.46625		-2.4822	NE	-6.99138		1.83575		0.599805	-6.94887	-4.52177		-1.50177		-3.65646	NE	-5.0969		-1.04109		-0.574454	NE	-0.575132		4.302		3.082
Patient 5	NE	-5.55519		0.00480611		-1.29489	NE	-6.37864		-0.80864		-7.45202	NE	-5.01105		-0.628953		-3.79233	-3.04823	-0.823446		-0.813446		-6.15713	NE	0.544146		-2.13709		-2.49744	NE	1.36759		0.179687		3.65969
Patient 6	-2.35139	-2.11358		-2.19358		-1.0834	-8.76295	-9.20561		-3.52561		-4.33943	-10.9068	1.60154		-1.23941		-1.66323	-6.41156	-7.09203		-1.33203		-3.25603	-8.55536	3.71512		3.40224		-0.579829	-2.1438	10.8071		2.2862		2.6762
Patient 7	-3.30376	-3.73947		-3.23947		-7.17377	NA	NA		NA		NA	-6.19204	6.27732		1.77996		-1.32443	NA	NA		NA		NA	-2.88828	10.0168		5.49156		5.84934	NA	NA		NA		NA
Patient 8	NE	2.52578		-0.0442203		NE	NE	NE		-2.0296		-0.814011	NE	7.32742		3.40854		2.62413	NE	NE		-1.98538		NE	NE	4.80164		-8.27993		NE	NE	NE		5.43814		3.43814
Patient 9	NE	7.81874		8.24874		5.76137	NE	-4.34513		-2.93513		-3.39499	NE	5.42294		0.187773		NE	NE	-14.5039		-11.1839		-9.74636	NE	-2.3958		1.84149		NE	NE	9.76807		3.1229		NE
Patient 10	-4.43671	-0.389989		-0.908531		-6.11725	NA	NA		NA		NA	2.03011	11.6459		1.91622		0.551254	NA	NA		NA		NA	6.46682	12.0358		5.21346		6.6685	NA	NA		NA		NA
Patient 11	-0.461694	-2.35585		-1.11585		-2.02925	-4.35235	0.153805		-1.52619		-6.41817	NA	NA		NA		NA	-3.89065	2.50965		-0.410345		-4.38892	NA	NA		NA		NA
Patient 12	-1.32387	-1.95921		-0.21921		0.0775709	-6.73692	-2.36479		-1.03479		-5.44098							-5.41306	-0.405579		-0.815579		-5.51855
Patient 13	-2.21495	-0.87696		0.0130396		-0.88	NE	1.13536		-0.784644		-3.87365							NE	2.01232		-0.797684		-2.99365
Patient 14	-1.98402	3.70265		-0.507348		-1.94713	-7.73027	-0.708866		-1.93887		-5.79684							-5.74625	-4.41152		-1.43152		-3.8497
Patient 15	-0.0230811	1.73208		-1.00792		-0.812513	-5.33248	-3.0145		-0.514498		-3.0008							-5.3094	-4.74658		0.493423		-2.18828
Patient 16	NE	NE		NE		NE	-5.13656	-4.72434		-2.74434		-5.7568	NE	NE		NE		NE	NE	NE		NE		NE	NE	NE		NE		NE
Patient 17	0.343312	-1.20208		-2.35208		-4.96349	-5.03581	-4.74706		0.802939		-2.55203	NA	NA		NA		NA	-5.37912	-3.54498		3.15502		2.41146	NA	NA		NA		NA
Patient 18	NE	NE		NE		NE	-2.35892	-1.07788		-0.627881		0.231555	NE	NE		NE		NE	NE	NE		NE		NE	NE	NE		NE		NE
Patient 19	1.97734	-0.152613		0.617387		0.478215	-5.05554	-5.74245		0.837547		-0.724016	NA	NA		NA		NA	-7.03288	-5.58984		0.220159		-1.20223	NA	NA		NA		NA
B, miRNAs
	Invasive front versus centre						Lymph node metastases versus centre						Liver metastases versus centre						Lymph node versus invasive front						Liver metastases versus invasive front						Lymph node metastases versus liver metastases
Patient no.	miR-1303	miR-199a-3p	miR-425-5p	miR-1225-3p	miR-1233-3p	miR-335-5p	miR-1303	miR-199a-3p	miR-425-5p	miR-1225-3p	miR-1233-3p	miR-335-5p	miR-1303	miR-199a-3p	miR-425-5p	miR-1225-3p	miR-1233-3p	miR-335-5p	miR-1303	miR-199a-3p	miR-425-5p	miR-1225-3p	miR-1233-3p	miR-335-5p	miR-1303	miR-199a-3p	miR-425-5p	miR-1225-3p	miR-1233-3p	miR-335-5p	miR-1303	miR-199a-3p	miR-425-5p	miR-1225-3p	miR-1233-3p	miR-335-5p
Patient 1	2.32913	1.53413	-1.3242	-0.93587	-1.07254	NA	NA	NA		NA		NA	1.20718	10.0142	10.4882	1.15718	1.11718	NA	NA	NA		NA		NA	-1.12195	8.48005	11.8124	2.09305	2.18972	NA	NA	NA		NA		NA
Patient 2	NE	1.58054	-0.559458	1.20054	0.880542								NE	8.50846	10.138	1.17398	1.20398								0.743434	6.92791	10.6975	-0.0265663	0.323434
Patient 3	-3.43303	2.61697	NE	NE	1.93697	NT	1.03192	4.68791	7.41192	NE	7.58192	NT	0.812755	6.8953	14.0523	NE	3.81276	NT	4.46494	2.07093	NE	2.84494	5.64494	NT	4.24578	4.27833	NE	NE	1.87578	NT	-0.219163	2.20739	6.64043	NE	-3.76916	NT
Patient 4	-0.537166	0.782834	NE	NE	3.37283		1.91751	2.3185	NE	NE	6.26751		-2.29383	4.33767	NE	NE	2.25617		2.45468	1.53567	1.82468	3.30468	2.89468		-1.75666	3.55484	8.08183	1.95334	-1.11666		-4.21134	2.01917	6.25715	-1.35134	-4.01134
Patient 5	-2.56982	0.670181	0.740181	-4.39982	-3.55982		-1.09542	7.20778	5.60458	NE	2.03458		-2.6656	6.64821	13.6296	-1.3056	0.0243976		1.4744	6.5376	4.8644	NE	5.5944		-0.0957838	5.97802	12.8894	3.09422	3.58422		-1.57018	-0.559575	8.02501	NE	-2.01018
Patient 6	-1.84386	-1.70386	-3.81886	-2.89386	-0.273863		0.181998	3.75622	3.467	4.282	2.392		-2.89663	3.36229	8.39673	-1.90663	-1.04663		2.02586	5.46009	7.28586	7.17586	2.66586		-1.05277	5.06615	12.2156	0.987231	-0.772769		-3.07863	-0.393932	4.92973	-6.18863	-3.43863
Patient 7	-1.84041	-0.977076	-3.99708	NE	-2.43708	NA	NA	NA		NA		NA	-0.647951	6.00565	8.53261	NE	1.77538	NA	NA	NA		NA		NA	1.19246	6.98272	12.5297	1.85246	4.21246	NA	NA	NA		NA		NA
Patient 8	0.68694	-1.04306	0.78694	3.22694	3.27694	NT	4.32111	6.88599	6.45111	7.41111	7.79111	NT	-0.33462	1.60948	9.74135	2.47538	2.32538	NT	3.63417	7.92905	5.66417	4.18417	4.51417	NT	-1.02156	2.65254	8.95441	-0.751561	-0.951561	NT	-4.65573	-5.27651	3.29024	-4.93573	-5.46573	NT
Patient 9	0.306702	1.6067	-0.0132983	-1.1633	1.4167		2.90636	8.8311	3.48636	3.28636	3.99636		1.39617	7.46692	10.6002	1.55617	2.46617		2.59966	7.2244	3.49966	4.44966	2.57966		1.08947	5.86022	10.6135	2.71947	1.04947		-1.51019	-1.36418	7.11386	-1.73019	-1.53019
Patient 10	-11.0023	1.56286	-1.16464	2.43286	2.97286	NA	NA	NA		NA		NA	NE	7.52324	9.55441	1.80587	2.66587	NA	NA	NA		NA		NA	NE	5.96038	10.7191	-0.62699	-0.30699	NA	NA	NA		NA		NA
Patient 11	NE	2.36379	0.21379	-0.0662096	-0.34621	NT	2.18566	1.18244	3.17566	5.03566	3.21566	NT	NA	NA		NA		NT	NE	-1.18135	2.96187	5.10187	3.56187	NT	NA	NA		NA		NT						NT
Patient 12	0.265488	1.60049	-1.00951	NE	-0.439512		4.67202	5.16446	2.83702	NE	6.72702								4.40653	3.56397	3.84653	6.87653	7.16653
Patient 13	0.562923	-0.477077	1.34292	-2.57708	-0.147077		NE	2.26392	5.40082	0.545824	1.56082								NE	2.741	4.0579	3.1229	1.7079
Patient 14	0.784103	-1.0759	NE	0.554103	-0.525897		7.46249	10.8435	NE	9.08249	6.75249								6.67839	11.9194	9.60339	8.52839	7.27839
Patient 15	-1.68921	2.59079	0.27746	-0.309206	-1.14921		5.06621	12.5445	11.3629	NE	7.05621								6.75541	9.95376	11.0854	NE	8.20541
Patient 16	NE	NE	NE	NE	NE		-0.751903	4.97313	4.3281	NE	1.0081		NE	NE		NE			NE	NE		NE			NE	NE		NE
Patient 17	2.34289	1.16289	-1.81711	1.57289	0.972889		NE	4.19046	4.21618	2.75618	0.0261845		NA	NA		NA			NE	3.02757	6.0333	1.1833	-0.946705		NA	NA		NA
Patient 18	NE	NE	NE	NE	NE		2.62617	6.00665	4.27617	3.80617	3.67617		NE	NE		NE			NE	NE		NE			NE	NE		NE
Patient 19	1.20385	0.673852	-2.45948	-0.696148	-2.70615		NE	1.99762	-0.90716	0.69284	1.02284		NA	NA		NA			NE	1.32377	1.55232	1.38899	3.72899		NA	NA		NA
miR-335-5p was not tested as it was not expressed in our previous study on colorectal cancer. NA, not available; NE, not expressed; NT, not tested.

## Sheet: Sheet1
	Patient	Sex	Age (years)	Tumor location	pTNM*	Analyzed tissue samples						Group
Column1	Column3	Column4	Column5	Column6	Column7	Central part	Invasive front	Lymph node metastasis	Liver metastasis	Column8	Column9	Column10	Column11
Patient 1	11	F	70	Sigma	T4N1M1a	+	+	+	+		N+ M+
Patient 2	12	M	31	Sigma	T3N2aM1a	+	+	+	+		N+ M+
Patient 3	14	M	68	Sigma	T4aN2aM1a	+	+	+	+		N+ M+
Patient 4	17	F	68	Rectum	T4aN1a	+	+	NA	+		N+ M+
Patient 5	15	M	68	Descendens	T3N1b	+	+	+	+		N+ M+
Patient 6	18	M	83	Ascendens	T4aN2aM1a	+	+	+	NA		N+ M+
Patient 7	19	F	88	Rectosigma	T4aN2bM1a	+	+	+	NA		N+ M+
Patient 8	1	M	54	Sigma	pT3N1	+	+	+	-		N+ M0
Patient 9	7	M	81	Ascendens	pT3N1b	+	+	+	-		N+ M0
Patient 10	10	M	68	Rectosigma	pT3N0M1a	+	+	-	+		N0 M+
Patient 11	8	F	79	Rectum	pT3N0M1a	+	+	-	+		N0 M+
Patient 12	9	M	69	Rectum	pT1NX	+	+	-	+		N0 M+
Patient 13	3	M	85	Sigma	pT3N1	+	+	+	-		N+ M0
Patient 14	5	F	85	Ascendens	pT3N1a	+	+	+	-		N+ M0
Patient 15	6	M	91	Ascendens	pT3N1b	+	+	+	-		N+ M0
Patient 16	4	M	62	Sigma	pT4aN2a	+	+	+	-		N+ M0
Patient 17	2	M	74	Sigma	pT3N1b	+	+	+	-		N+ M0
Patient 18	16	F	82	Descendens	T4aN1bM1a	+	+	+	+		N+ M+
Patient 19	13	M	66	Sigma	T4aN1bM1a	+	+	+	+		N+ M+
Patient	Sex	Age (years)	Tumor location	pTNM*		Analyzed tissue samples			Group
					Central part	Invasive front	Lymph node metastasis	Liver metastasis
Patient 1	F	70	Sigma	T4N1M1a	+	+	+	+	N+ M+
Patient 2	M	31	Sigma	T3N2aM1a	+	+	+	+	N+ M+
Patient 3	M	68	Sigma	T4aN2aM1a	+	+	+	+	N+ M+
Patient 4	F	68	Rectum	T4aN1a	+	+	NA	+	N+ M+
Patient 5	M	68	Descendens	T3N1b	+	+	+	+	N+ M+
Patient 6	M	83	Ascendens	T4aN2aM1a	+	+	+	NA	N+ M+
Patient 7	F	88	Rectosigma	T4aN2bM1a	+	+	+	NA	N+ M+
Patient 8	M	54	Sigma	pT3N1	+	+	+	-	N+ M0
Patient 9	M	81	Ascendens	pT3N1b	+	+	+	-	N+ M0
Patient 10	M	68	Rectosigma	pT3N0M1a	+	+	-	+	N0 M+
Patient 11	F	79	Rectum	pT3N0M1a	+	+	-	+	N0 M+
Patient 12	M	69	Rectum	pT1NX	+	+	-	+	N0 M+
Patient 13	M	85	Sigma	pT3N1	+	+	+	-	N+ M0
Patient 14	F	85	Ascendens	pT3N1a	+	+	+	-	N+ M0
Patient 15	M	91	Ascendens	pT3N1b	+	+	+	-	N+ M0
Patient 16	M	62	Sigma	pT4aN2a	+	+	+	-	N+ M0
Patient 17	M	74	Sigma	pT3N1b	+	+	+	-	N+ M0
Patient 18	F	82	Descendens	T4aN1bM1a	+	+	+	+	N+ M+
Patient 19	M	66	Sigma	T4aN1bM1a	+	+	+	+	N+ M+
